# Supplementary material for: Ionic conduction mechanism in Ca-doped lanthanum oxychloride
Source: Royal Society of Chemistry journal article supplement (doi:10.1039/d0dt02502j), 2020-11-25
Supplement: d0dt02502j4.pdf [file d0dt02502j4.pdf]

Supporting information

Title:

Ionic conduction mechanism in Ca-doped Lanthanum Oxychloride

Kazuki Shitara<sup>1,2</sup>, Akihide Kuwabara<sup>2</sup>, Keisuke Hibino<sup>3</sup>, Kotaro Fujii<sup>3</sup>, Masatomo Yashima<sup>3</sup>, James

R. Hester<sup>4</sup> Masanori Umeda<sup>5</sup>, Naoyoshi Nunotani<sup>5</sup>, Nobuhito Imanaka<sup>5</sup>

<sup>1</sup> Joint and Welding Research Institute, Osaka University

<sup>2</sup> Nanostructures Research Laboratory, Japan Fine Ceramics Center

<sup>3</sup> Department of Chemistry, School of Science, Tokyo Institute of Technology

<sup>4</sup> ANSTO

<sup>5</sup> Department of Applied Chemistry, Faculty of Engineering, Osaka University

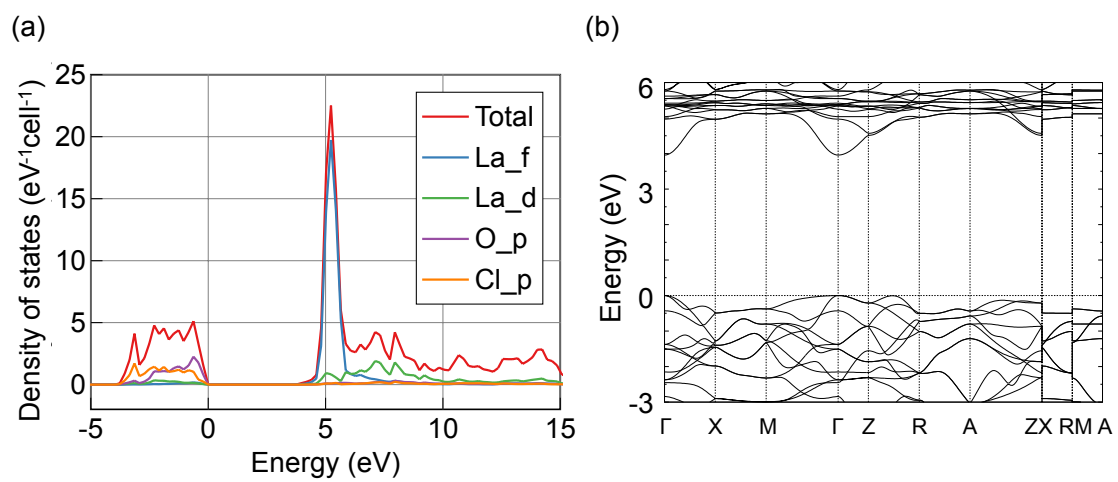

Figure S1 Calculated (a) density of states and (b) band structure of LaOCl

Figure S2 shows the atomic structures around  $V_{Cl}$  optimized by first-principles calculations. In the  $V_{Cl}$  model, there are three independent distances between the Cl vacancy site and surrounding ions: two types of distances between  $V_{Cl}$  and La, and one distance between  $V_{Cl}$  and Cl. The distances before and after the structure optimization are summarized in Table S1. The distance between La and  $V_{Cl}$  became shorter and the distance between Cl and vacancy became longer after structure optimization in this model. Attractive Coulomb interactions occur between  $La^{3+}$  and  $Cl^-$  ions. In contrast,  $Cl^-$  ions have repulsive Coulomb interactions towards each other. Electrostatic interactions disappear owing to the Cl vacancy formation, as  $La^{3+}$  ions move away from the Cl vacancy site and  $Cl^-$  ions shift toward the Cl vacancy site. In the  $V_{Cl}$  model, the thickness of the Cl layer is expanded as the distance between  $V_{Cl}$  and La increases. This is possibly the reason for the conduction of  $Cl^-$  ions.

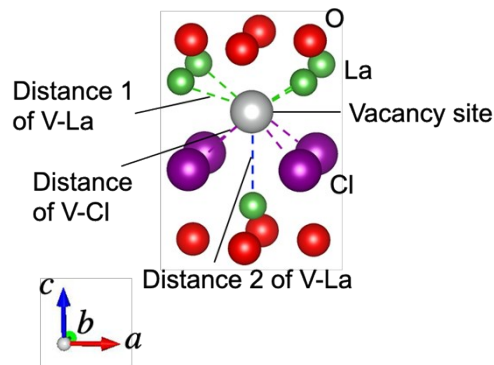

Figure S2. Local structure of a  $Cl^-$  ion vacancy in  $LaOCl$  crystal

Table S1. Distances related to a  $Cl^-$  ion vacancy before and after structure optimization

|                    | Distance before structure optimization ( $\text{\AA}$ ) | Distance after structure optimization ( $\text{\AA}$ ) |
|--------------------|---------------------------------------------------------|--------------------------------------------------------|
| Distance 1 of V-La | 3.165                                                   | 3.227                                                  |
| Distance 2 of V-La | 3.107                                                   | 3.181                                                  |
| Distance of V-Cl   | 3.389                                                   | 3.168                                                  |
