# Supplementary material for: Ionic conduction mechanism in Ca-doped lanthanum oxychloride
Source: Royal Society of Chemistry journal article supplement (doi:10.1039/d0dt02502j), 2020-11-25
Supplement: d0dt02502j5.pdf [file d0dt02502j5.pdf]

|                    | Distance before<br>structure<br>optimization (Å) | Distance after<br>structure<br>optimization (Å) |
|--------------------|--------------------------------------------------|-------------------------------------------------|
| Distance 1 of V-La | 3.165                                            | 3.227                                           |
| Distance 2 of V-La | 3.107                                            | 3.181                                           |
| Distance of V-Cl   | 3.389                                            | 3.168                                           |
