# Supplementary figures and images for: Ionic conduction mechanism in Ca-doped lanthanum oxychloride
Source: Royal Society of Chemistry journal article supplement (doi:10.1039/d0dt02502j), 2020-11-25

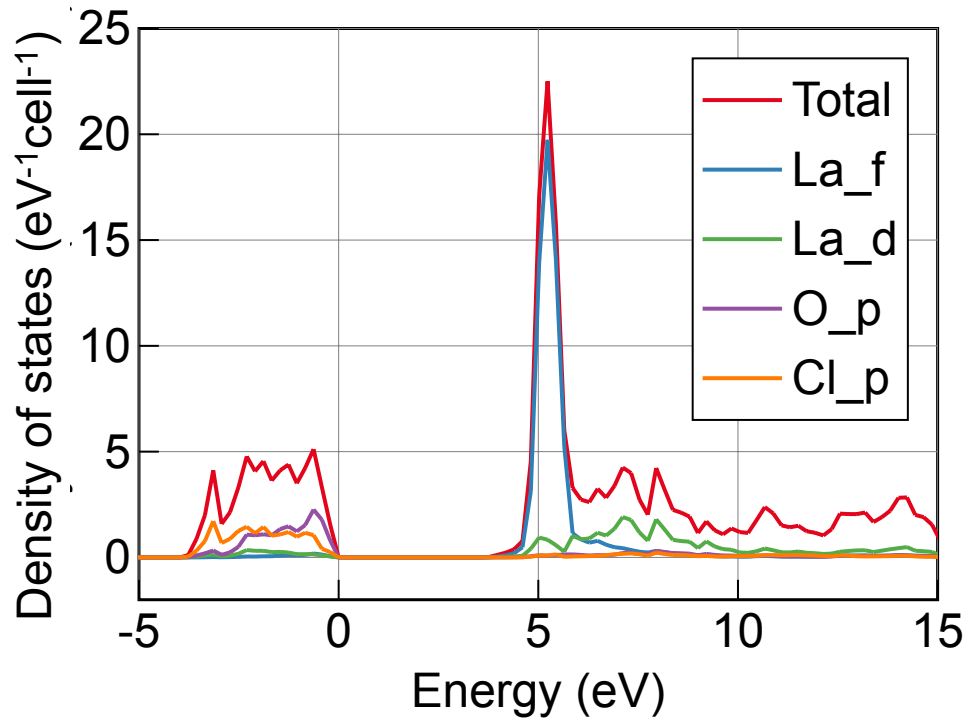

(b)

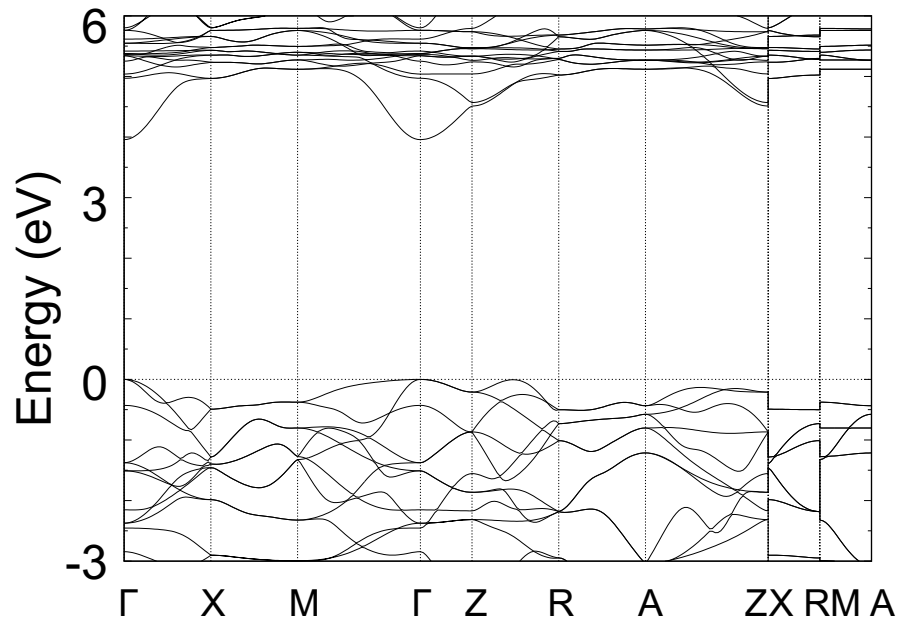

Supplement: d0dt02502j2.pdf [file d0dt02502j2.pdf]

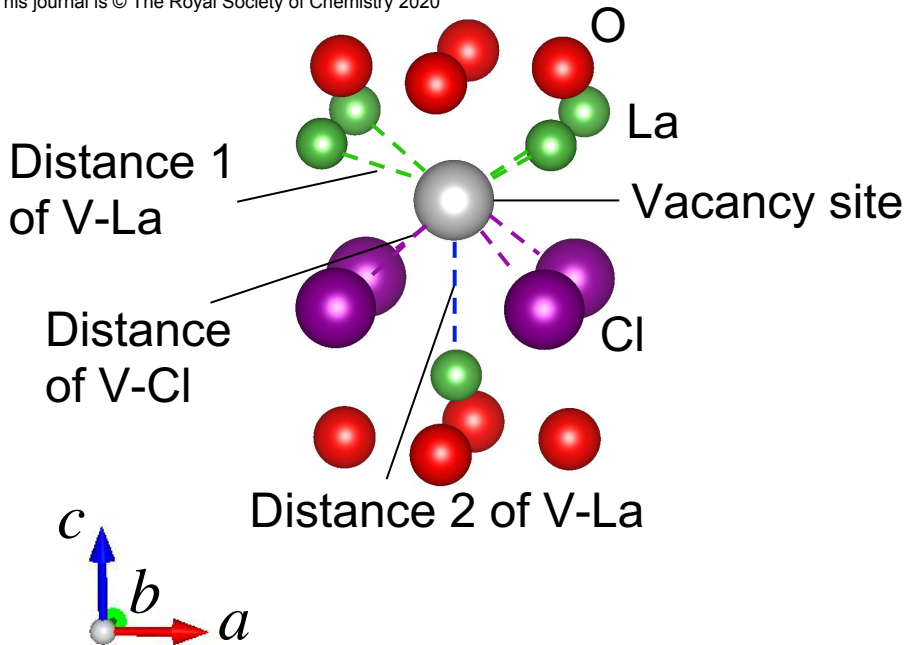

Supplement: d0dt02502j3.pdf [file d0dt02502j3.pdf]
